# Supplementary material for: Efficacy and safety of cardioprotective drugs in chemotherapy-induced cardiotoxicity: an updated systematic review & network meta-analysis
Source: PubMed Central journal article supplement (PMC9938608; doi:10.1186/s40959-023-00159-0), 2023-02-18
Supplement: 40959_2023_159_MOESM2_ESM.pdf [file 40959_2023_159_MOESM2_ESM.pdf]

A

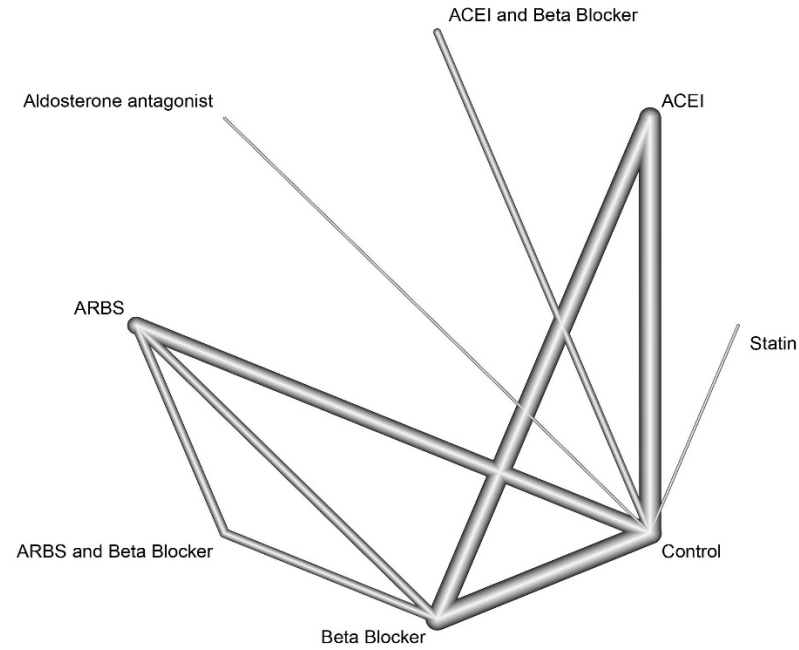

B

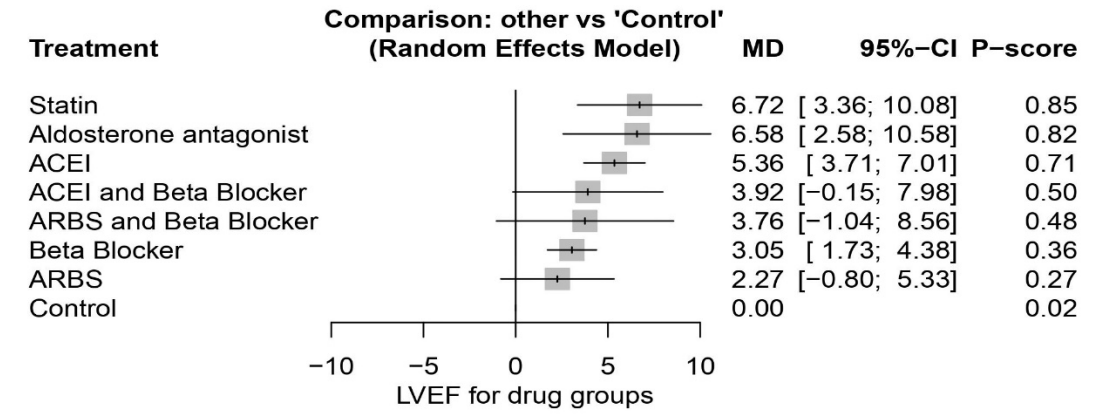

tau-squared = 6.8806; I-squared = 98.3%; P < 0.001

C

|                               |                               |                              |                              |                              |                              |                        |                |
|-------------------------------|-------------------------------|------------------------------|------------------------------|------------------------------|------------------------------|------------------------|----------------|
| <b>Statin</b>                 |                               |                              |                              |                              |                              |                        |                |
| 0.14<br>[ -5.08; 5.36]        | <b>Aldosterone antagonist</b> |                              |                              |                              |                              |                        |                |
| 1.36<br>[ -2.38; 5.11]        | 1.22<br>[ -3.10; 5.55]        | <b>ACEI</b>                  |                              |                              |                              |                        |                |
| 2.81<br>[ -2.47; 8.08]        | 2.66<br>[ -3.04; 8.36]        | 1.44<br>[ -2.94; 5.83]       | <b>ACEI and Beta Blocker</b> |                              |                              |                        |                |
| 2.96<br>[ -2.89; 8.82]        | 2.82<br>[ -3.42; 9.06]        | 1.60<br>[ -3.41; 6.61]       | 0.16<br>[ -6.13; 6.44]       | <b>ARBS and Beta Blocker</b> |                              |                        |                |
| <b>3.67</b><br>[ 0.06; 7.28]  | 3.53<br>[ -0.68; 7.74]        | <b>2.30</b><br>[ 0.43; 4.18] | 0.86<br>[ -3.41; 5.14]       | 0.71<br>[ -4.03; 5.44]       | <b>Beta Blocker</b>          |                        |                |
| 4.46<br>[ -0.09; 9.01]        | 4.31<br>[ -0.72; 9.35]        | 3.09<br>[ -0.34; 6.53]       | 1.65<br>[ -3.44; 6.74]       | 1.49<br>[ -3.24; 6.23]       | 0.79<br>[ -2.37; 3.94]       | <b>ARBS</b>            |                |
| <b>6.72</b><br>[ 3.36; 10.08] | <b>6.58</b><br>[ 2.58; 10.58] | <b>5.36</b><br>[ 3.71; 7.01] | 3.92<br>[ -0.15; 7.98]       | 3.76<br>[ -1.04; 8.56]       | <b>3.05</b><br>[ 1.73; 4.38] | 2.27<br>[ -0.80; 5.33] | <b>Control</b> |
