# Supplementary material for: Efficacy and safety of cardioprotective drugs in chemotherapy-induced cardiotoxicity: an updated systematic review & network meta-analysis
Source: PubMed Central journal article supplement (PMC9938608; doi:10.1186/s40959-023-00159-0), 2023-02-18
Supplement: 40959_2023_159_MOESM4_ESM.pdf [file 40959_2023_159_MOESM4_ESM.pdf]

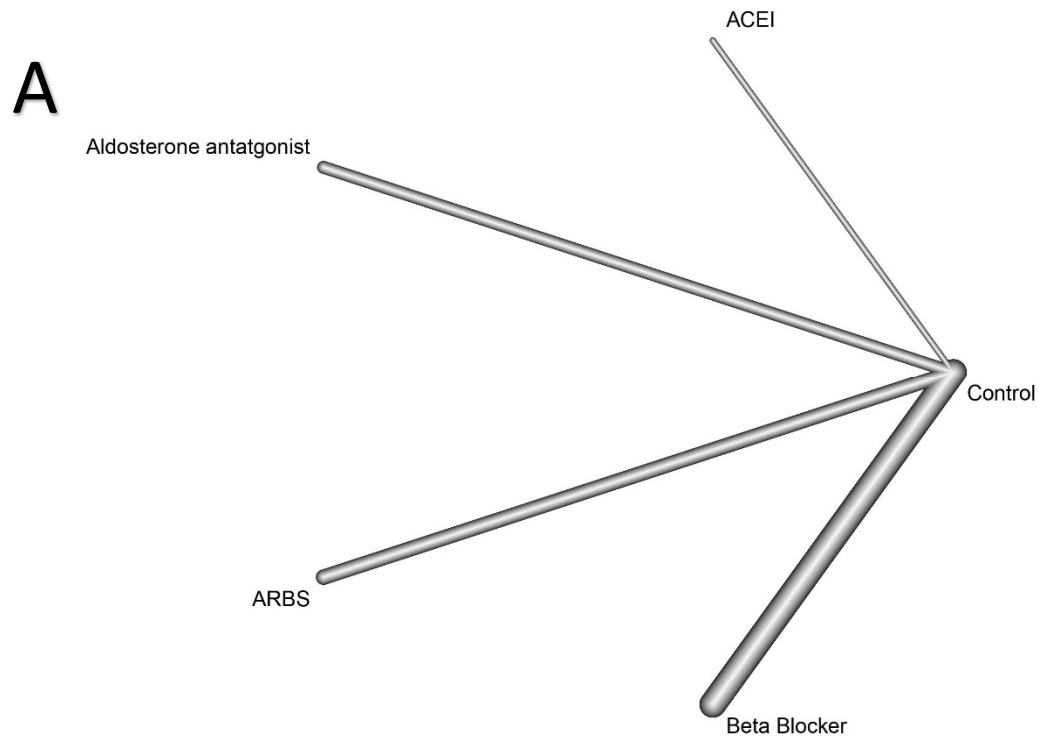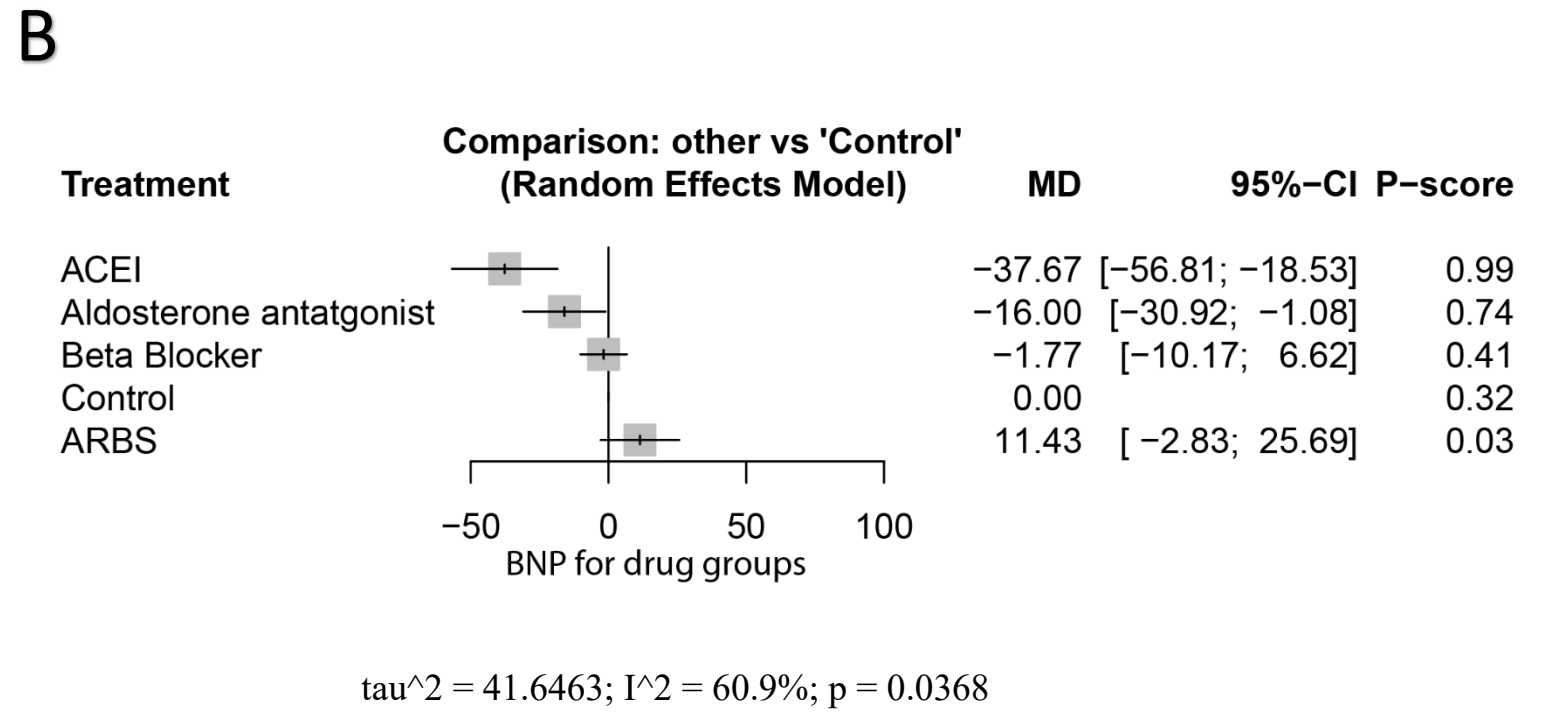

**C**

|                         |                        |                       |                       |      |
|-------------------------|------------------------|-----------------------|-----------------------|------|
| ACEI                    |                        |                       |                       |      |
| -21.67 [-45.94; 2.59]   | Aldosterone antagonist |                       |                       |      |
| -35.90 [-56.80; -15.00] | -14.23 [-31.34; 2.89]  | Beta Blocker          |                       |      |
| -37.67 [-56.81; -18.53] | -16.00 [-30.92; -1.08] | -1.77 [-10.17; 6.62]  | Control               |      |
| -49.10 [-72.97; -25.23] | -27.43 [-48.06; -6.80] | -13.20 [-29.75; 3.34] | -11.43 [-25.69; 2.83] | ARBS |
