# Supplementary material for: Efficacy and safety of cardioprotective drugs in chemotherapy-induced cardiotoxicity: an updated systematic review & network meta-analysis
Source: PubMed Central journal article supplement (PMC9938608; doi:10.1186/s40959-023-00159-0), 2023-02-18
Supplement: 40959_2023_159_MOESM5_ESM.pdf [file 40959_2023_159_MOESM5_ESM.pdf]

**A**

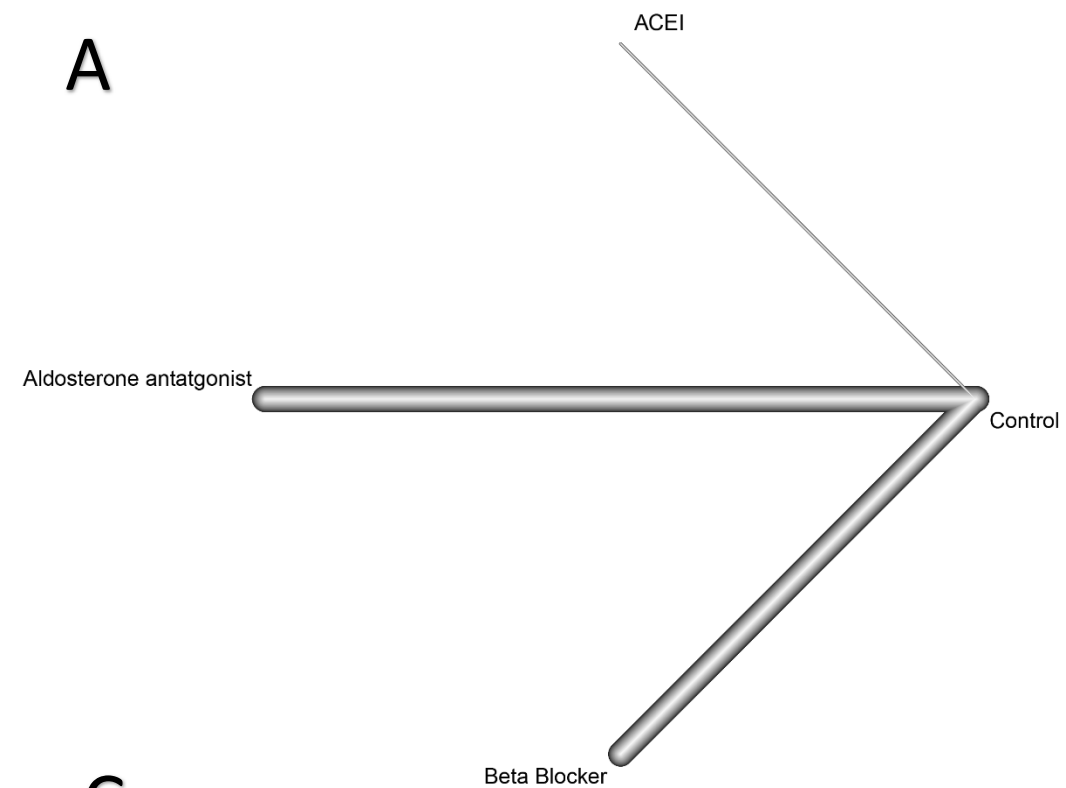

**B**

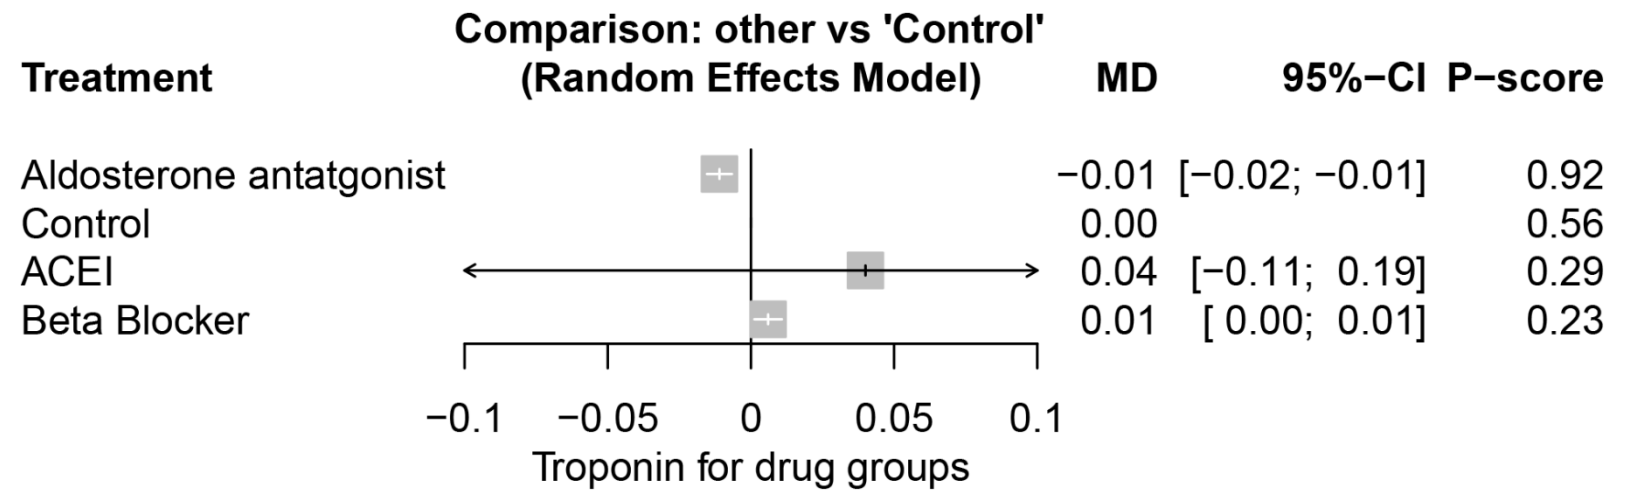

**C**

|                                |                     |                    |                     |
|--------------------------------|---------------------|--------------------|---------------------|
| <b>Aldosterone antatgonist</b> |                     |                    |                     |
| -0.01 [-0.02; -0.01]           | <b>Control</b>      |                    |                     |
| -0.05 [-0.20; 0.10]            | -0.04 [-0.19; 0.11] | <b>ACEI</b>        |                     |
| -0.02 [-0.02; -0.01]           | -0.01 [-0.01; 0.00] | 0.03 [-0.12; 0.18] | <b>Beta Blocker</b> |
