# Supplementary material for: Efficacy and safety of cardioprotective drugs in chemotherapy-induced cardiotoxicity: an updated systematic review & network meta-analysis
Source: PubMed Central journal article supplement (PMC9938608; doi:10.1186/s40959-023-00159-0), 2023-02-18
Supplement: 40959_2023_159_MOESM6_ESM.pdf [file 40959_2023_159_MOESM6_ESM.pdf]

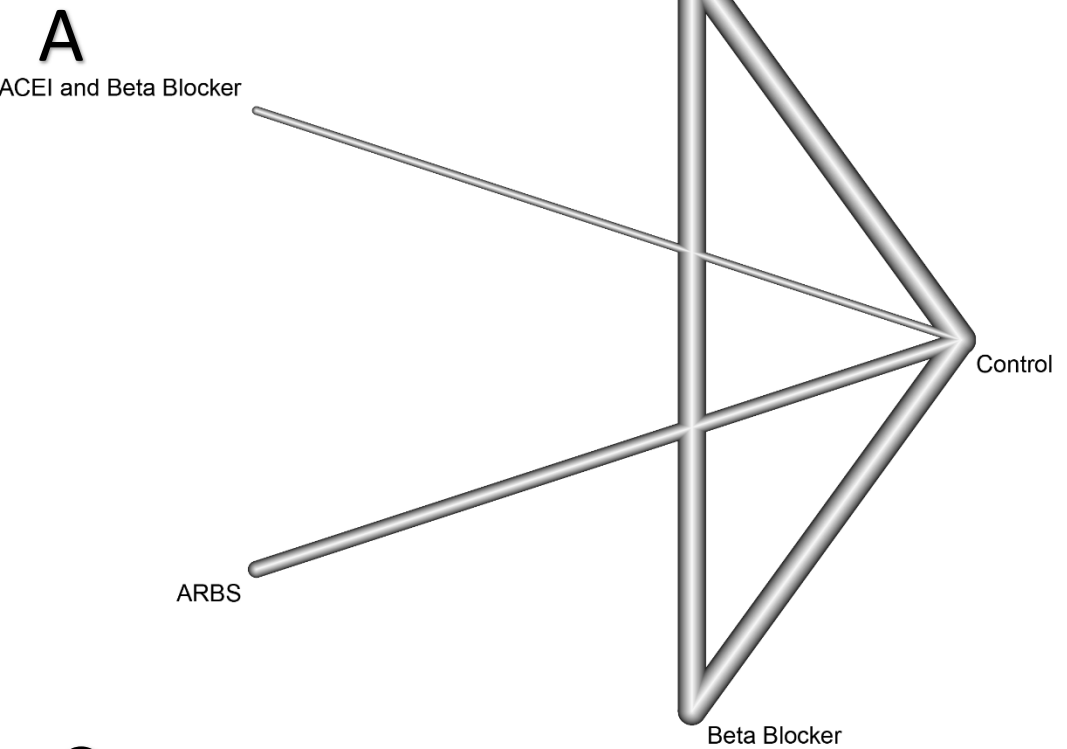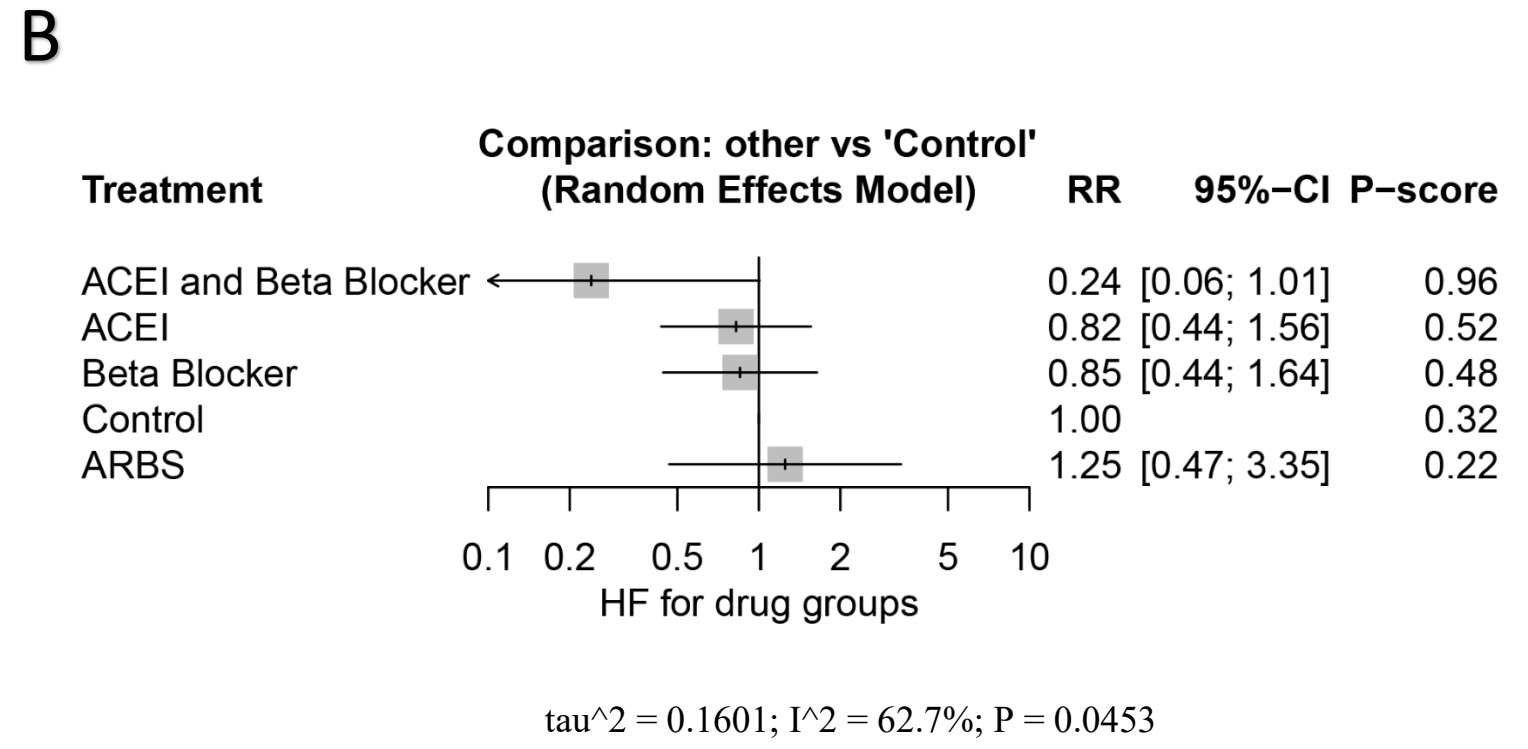

**C**

| ACEI and Beta Blocker | ACEI              | Beta Blocker      | Control           | ARBS |
|-----------------------|-------------------|-------------------|-------------------|------|
| 0.29 [0.06; 1.40]     |                   |                   |                   |      |
| 0.28 [0.06; 1.36]     | 0.97 [0.50; 1.86] |                   |                   |      |
| 0.24 [0.06; 1.01]     | 0.82 [0.44; 1.56] | 0.85 [0.44; 1.64] |                   |      |
| 0.19 [0.03; 1.09]     | 0.66 [0.20; 2.13] | 0.68 [0.21; 2.23] | 0.80 [0.30; 2.14] |      |
